CORRECTION

# Correction: Identification of grade and origin specific cell populations in serous epithelial ovarian cancer by single cell RNA-seq

**Andrew J. Shih, Andrew Menzin, Jill Whyte, John Lovecchio, Anthony Liew, Houman Khalili, Tawfiqul Bhuiya, Peter K. Gregersen, Annette T. Lee**

The following information is missing from the Funding section: This study was funded by Partners Council for Women's Health.

## Reference

1. Shih AJ, Menzin A, Whyte J, Lovecchio J, Liew A, Khalili H, et al. (2018) Identification of grade and origin specific cell populations in serous epithelial ovarian cancer by single cell RNA-seq. PLoS ONE 13 (11): e0206785. <https://doi.org/10.1371/journal.pone.0206785> PMID: 30383866

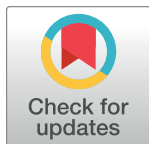

## OPEN ACCESS

**Citation:** Shih AJ, Menzin A, Whyte J, Lovecchio J, Liew A, Khalili H, et al. (2018) Correction: Identification of grade and origin specific cell populations in serous epithelial ovarian cancer by single cell RNA-seq. PLoS ONE 13(12): e0208778. <https://doi.org/10.1371/journal.pone.0208778>

**Published:** December 4, 2018

**Copyright:** © 2018 Shih et al. This is an open access article distributed under the terms of the [Creative Commons Attribution License](https://creativecommons.org/licenses/by/4.0/), which permits unrestricted use, distribution, and reproduction in any medium, provided the original author and source are credited.
